# Supplementary material for: P-glycoproteins play a role in ivermectin resistance in cyathostomins
Source: PubMed Central journal article supplement (PMC5681340; doi:10.1016/j.ijpddr.2017.10.006), 2017-10-25
Supplement: mmc1.pdf [file mmc1.pdf]

C\_elongatus\_pgp9 MGLFKKKEEKEKPTISTEGSKGSEEEEEAPKASIVQLFRYASGFDKLLLLLGLCLVSIATGVGMPLMSIIMGNVSQNFMDVTGNYTDPNLIHQFEHVDVIQNCLKYVYLGGCIFAAATIQAM  
DSW\_C -----

C\_elongatus\_pgp9 CFLTVCENLVNQLRREFFKAILRQDITWYDKNNSGTLAPKLFNLERVKEGTGDKLGLMIQFVAQFFGGFIVAFTYDWKLTLMMSLSPFMIICGAFIAKLMASAATEEAKKYAVAGGIA  
DSW\_C -----CENLVNQLRREFFKAILRQDITWYDKNNSGTLAPKLFNLERVKEGTGDKLGLMIQFVAQFFGGFIVAFTYDWKLTLMMSLSPFMIICGAFIAKLMASAATEEAKKYAVAGGIA  
\*\*\*\*\*

C\_elongatus\_pgp9 EEVLTSMRTVIAFNGQPYECERYDVALAAGRSTGIKKSLYIGLGLALTFTIMFSSYCLAFVWGTDFVYKGTMKGGTVMTVFFSVMMGSMALGQAGPQFAVLGTAMGAAGSLYQIIDREPE  
DSW\_C EEVLTSMRTVIAFNGQPYECERYDVALAAGRSTGIKKSLYIGLGLALTFAIMFSSYCLAFVWGTDFVYNGTMKGGTVMTVFFSVMMGSMALGQAGPQFAVLGTAMGAAGSLYQIIDREPE  
\*\*\*\*\*

C\_elongatus\_pgp9 IDAYLKAGMKPSNLKGRISVSSVKFSYPTRPDIPILKGISFEANPGETIALVSSSGCGKSTIIQLLRYYDPAGGKISIDGIEIDKINIEYLRNYIAVVSQEPVLFNTTIEQNIRYGREP  
DSW\_C IDAYSTAGMKPSNLRGRISVSSVKFSYPTRPDIPILKGISFEANPGETIALVSSSGCGKSTIIQLLRYYDPAGGKISIDGVEINKINIEFLRNYI-----  
\*\*\*\*.\*\*\*\*\*:\*\*\*\*\*:\*\*\*\*\*:\*\*\*\*\*:\*\*\*\*\*:\*\*\*\*\*:\*\*\*\*\*:\*\*\*\*\*:\*\*\*\*\*:\*\*\*\*\*:\*\*\*\*\*:\*\*\*\*\*:\*\*\*\*\*:\*\*\*\*\*:\*\*\*\*\*:\*\*\*\*\*

C\_elongatus\_pgp9 ITEAEIIAALRKANAYNFVQSFPEGIKTNVGDRTQMSGGQKQRIAARALVRDPKILLLDEATBALDAESEHVVQALENASQGRTTIVIAHRLSTIRNADRIIAMKDGEVMEVGTHDE  
DSW\_C -----

C\_elongatus\_pgp9 LIARKGLYHELVNAQVFADVDDMAKGAGKRKSVSSRRSSTSSIGHPELRLKSQLSQEVDKIEQSDPKKAEKDLERLKKELBEEGAVKANLFKILHYARPEWAFIFIAVLSAIVQGCVF  
DSW\_C -----

C\_elongatus\_pgp9 PAFSLFFTEIIEVFARPPGDPNLQSRGHFWALMFLLLGGVEAVCMITQCFFFLSAERLTMRLRSKVFHNVMRMDAAAYFDMPRHSPGKITRRLATDAPNVKSAIDYRFGSVFNSFVSVCC  
DSW\_C -----

C\_elongatus\_pgp9 GIGIAFYFGWQMAALLTIAIFPLAGVAHGFQMRFMSSGRAGGDAKEMENSGKIAMEAIENIRTVQALTLEHRLHHLFCQHLDGPHKTNKRRAIMQGGAYGFSSIFFFLYAASFRFGLWLIL  
DSW\_C -----

C\_elongatus\_pgp9 NGDMMPMNVLRLVFAISFTAGSLGFASAYFPEYKATFAAGLIFNMLKDEPRIDGMTDKGKPKLTGSI SLKNVFFNYPERPNVPILQGLDVSVPGETLALVSPSGCGKSTVVSLLERL  
DSW\_C -----

C\_elongatus\_pgp9 YDPLDGVVAVDGNDLREMNPHLRSHIALVVSQEPILFDTSIIRDNIYVGLPAGSVTEAMIMEVAQRANIHKFISELPDGFNTRVGEKGTQLSGGQKQRIAARALIRNPKILLLDEATBAL  
DSW\_C -----

C\_elongatus\_pgp9 DTESEKLVQEALDKASKGRTCVVVAHRLSTVVCNVCIMVVKSGKIVEKGTNHELMQAKGAYWALTQKQNIHTN  
DSW\_C -----
